# Supplementary material for: Stated preferences of adolescents and young adults for sexual and reproductive health services in Africa: a systematic review protocol
Source: PubMed Central journal article supplement — BMJ Open. 2024 Sep 10;14(9):e079502. doi: 10.1136/bmjopen-2023-079502 (PMC11409390; doi:10.1136/bmjopen-2023-079502), 2024-09-10
Supplement: bmjopen-14-9-s002.pdf [file bmjopen-14-9-s002.pdf]

## Supplementary Material 2: Data Extraction template

|                                                                            |  |
|----------------------------------------------------------------------------|--|
| <b>Study context</b>                                                       |  |
| General study characteristics (title, author(s): year published, citation) |  |
| Type of study (DCE, Best worst or Thurstone Scale)                         |  |
| Sources of funding                                                         |  |
| Competing interests                                                        |  |
| Setting (country, focus, disease condition)                                |  |
| Objective                                                                  |  |
| Mode of survey administration                                              |  |
| Ethical considerations                                                     |  |
| Inclusion/exclusion criteria                                               |  |
| <b>Participant characteristics</b>                                         |  |
| Participants' age (min-max, mean)                                          |  |
| Participants sex                                                           |  |
| Participants' pre-existing conditions (HIV, STI, CSW)                      |  |
| Education background                                                       |  |
| <b>Sampling</b>                                                            |  |
| Sampling and recruitment                                                   |  |
| Sample population (patient, healthcare provider, general public)           |  |

|                                                                 |  |
|-----------------------------------------------------------------|--|
| Sample size                                                     |  |
| Were the sample size calculations carried out?                  |  |
| <b>Attributes and Levels of Development</b>                     |  |
| Was a literature review conducted?                              |  |
| Consultation with experts in the field?                         |  |
| Focus group? If yes, what was the size of the focus group?      |  |
| Interviews? If yes, how many interviews, and with whom?         |  |
| Tested using a pilot study? If yes, how many participated?      |  |
| Any other notable characteristics of attribute development      |  |
| Number of attributes                                            |  |
| List of attributes                                              |  |
| List of levels for each attribute                               |  |
| Method of attribute presentation (picture, text only, emoji...) |  |
| <b>Survey design</b>                                            |  |
| Number of options presented per task                            |  |
| Number of attributes presented for each option                  |  |
| Was an opt-out option included?                                 |  |
| Is a dominant choice question included?                         |  |

|                                                                                                                                      |  |
|--------------------------------------------------------------------------------------------------------------------------------------|--|
| Was there a block design?                                                                                                            |  |
| Total number of questions - tasks (not including dominant choices)                                                                   |  |
| Type of design (full factorial, partial factorial, etc.)                                                                             |  |
| What software is used for experimental design? (Ngene, Sawtooth, SAS, etc.)                                                          |  |
| What criteria were used to judge the design?                                                                                         |  |
| Administration method (electronic, paper-based)                                                                                      |  |
| <b>Additional data collected</b>                                                                                                     |  |
| Demographic information collected?                                                                                                   |  |
| Disease history collected?                                                                                                           |  |
| Was any other data collected?<br>If so, what?                                                                                        |  |
| Anything else asked? If so, what?                                                                                                    |  |
|                                                                                                                                      |  |
| <b>Analysis</b>                                                                                                                      |  |
| What was the main method of analysis?                                                                                                |  |
| Any secondary method(s) of analysis?                                                                                                 |  |
| Software used for analysis                                                                                                           |  |
| Estimation procedure (probit, random effect probit, logit, random effect logit, CLM, mixed logit, latent scale, heteroskedastic ...) |  |

| <b>Outcome measures</b>                                                               |  |
|---------------------------------------------------------------------------------------|--|
| Were results presented using importance scores?                                       |  |
| Were results presented using time until progression as numeraire?                     |  |
| Were results presented using money as numeraire (i.e. WTP)?                           |  |
| Were results presented using maximum acceptable risk?                                 |  |
| Were results presented using a predicted probability of uptake?                       |  |
| Were results presented using utilities?                                               |  |
| Was participant heterogeneity examined in any other way?<br>If so, what was examined? |  |
| <b>Conclusions</b>                                                                    |  |
| What was the most valued positive attribute?                                          |  |
| What was the second most valued positive attribute?                                   |  |
| What was the most valued negative attribute?                                          |  |
| What was the second most valued negative attribute?                                   |  |
| If looking at the mode of administration, what was the most preferred method?         |  |
| If looking at the mode of administration, what was the least preferred method?        |  |

|                           |  |
|---------------------------|--|
| Summary of other findings |  |
|---------------------------|--|
